# Supplementary material for: Organic nanocrystals of [2.2]paracyclophanes achieved via sonochemistry: enhanced and red-shifted emission involving edge-to-face chromophores
Source: Royal Society of Chemistry journal article supplement (doi:10.1039/c2ce26000j), 2012-01-01
Supplement: c2ce26000j.pdf [file c2ce26000j.pdf]

# Organic nanocrystals of [2.2]paracyclophanes achieved via sonochemistry: enhanced red-shifted emission involving edge-to-face chromophores

Elizabeth Elacqua,<sup>a</sup> Paul T. Jurgens,<sup>a</sup> Jonas Baltrusaitis,<sup>a,c</sup> and Leonard R. MacGillivray<sup>\*a,b</sup>

<sup>a</sup> Department of Chemistry, University of Iowa, Iowa City, IA 52242

<sup>b</sup> Optical Science and Technology Center, University of Iowa, Iowa City, IA 52242

<sup>c</sup> Central Microscopy Research Facility, University of Iowa, Iowa City, IA 52242

len-macgillivray@uiowa.edu

---

## Supporting Information

**Materials:** pCp was purchased from Carbosynth (Compton, Berkshire, UK). SDS was purchased from Sigma Aldrich Chemical Company (St. Louis, MO, USA). N,N-dimethylformamide, toluene, and ethanol were purchased from Fisher Scientific Company (Pittsburgh, PA, USA). tpcp was prepared as reported. All chemicals were used without further purification.

**Methods:** PXRD data was collected using a Bruker D-5000 diffractometer equipped with a Bruker SOL-X energy-sensitive detector using CuK<sub>α</sub> radiation ( $\lambda = 1.54056 \text{ \AA}$ ). Particle size measurements were determined by a Zetasizer Nano ZS (Malvern, Southborough, MA) instrument at 25°C. SEM images were obtained using a Hitachi S-48000 with an accelerating voltage range of 2-5 kV. SEM samples were prepared by depositing each sample on a Si wafer. Absorption and emission measurements were obtained using a HORIBA Jobin Yvon FluoroMax-4 (Edison, NJ, USA). All measurements were made on the as-prepared suspensions with a scan rate of 5 mm sec<sup>-1</sup> and both slit widths set to 2 nm. Solution-based measurements were obtained using N,N-dimethylformamide as solvent. Micrometer-sized and Nanometer-sized particles were measured as suspensions in water and 0.021 M SDS<sub>(aq)</sub>. The suspension measurements were conducted using an aliquot of the suspension after re-precipitation (micro) and/or after sonication (nano).

## PXRDs

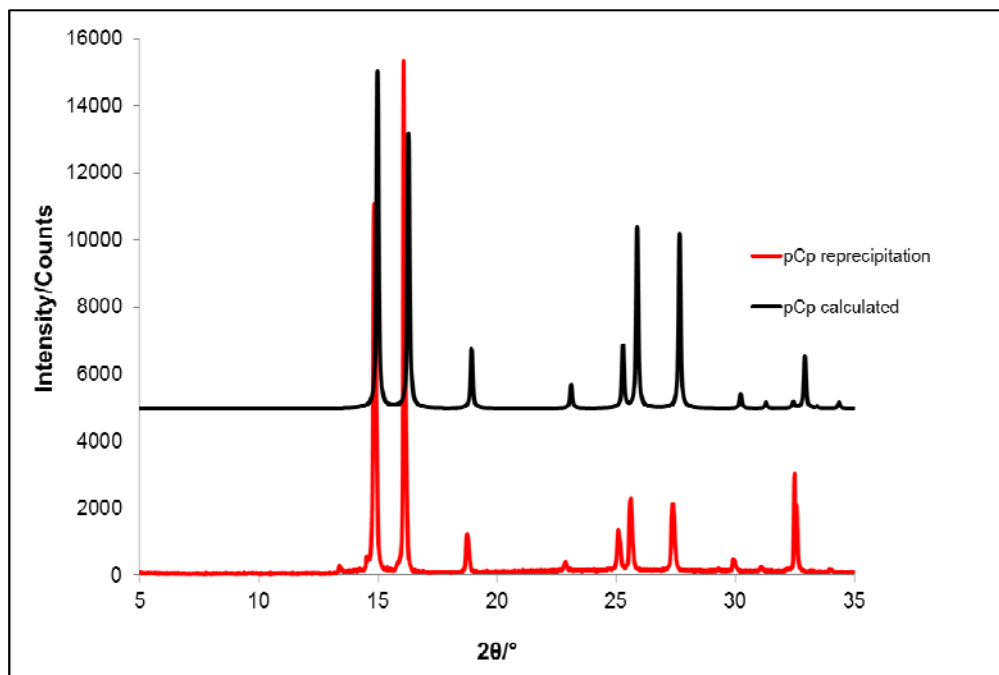

**Figure S-1:** PXRD diffractogram of a sample obtained during reprecipitation of pCp compared to the calculated pattern.

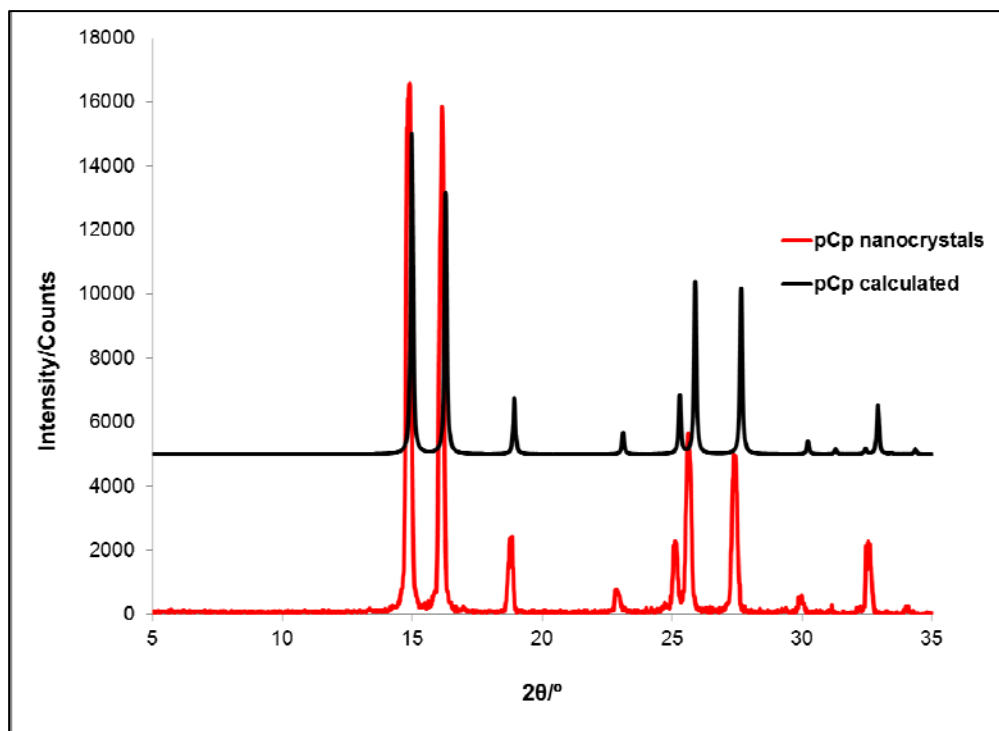

**Figure S-2:** PXRD diffractogram of pCp nanocrystals compared to the calculated pattern.

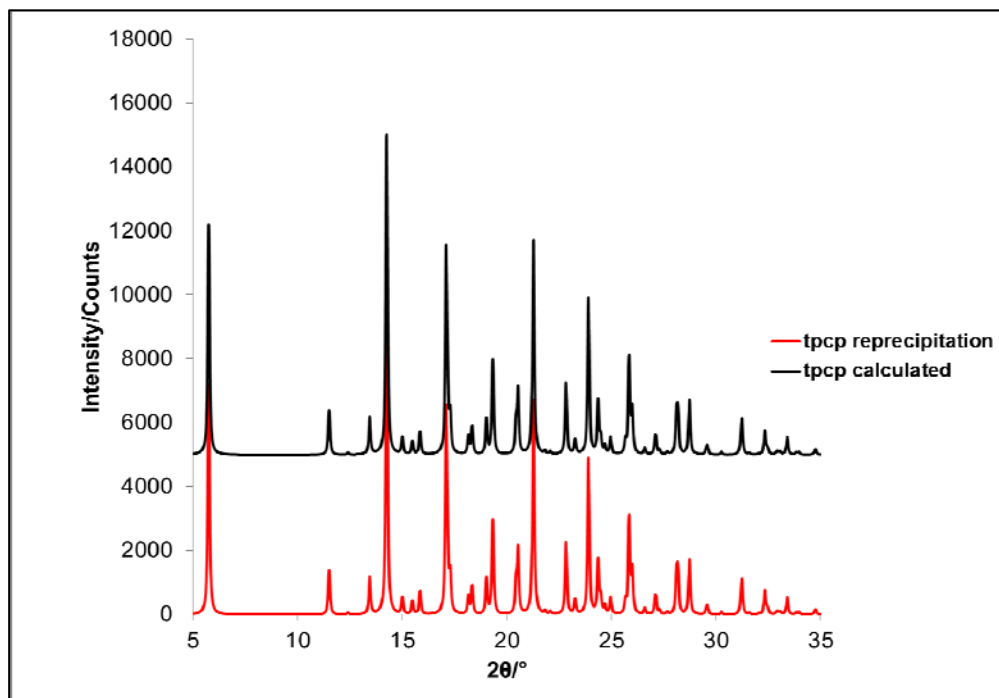

**Figure S-3:** PXRd diffractogram of a sample obtained during reprecipitation of tcp compared to the calculated pattern.

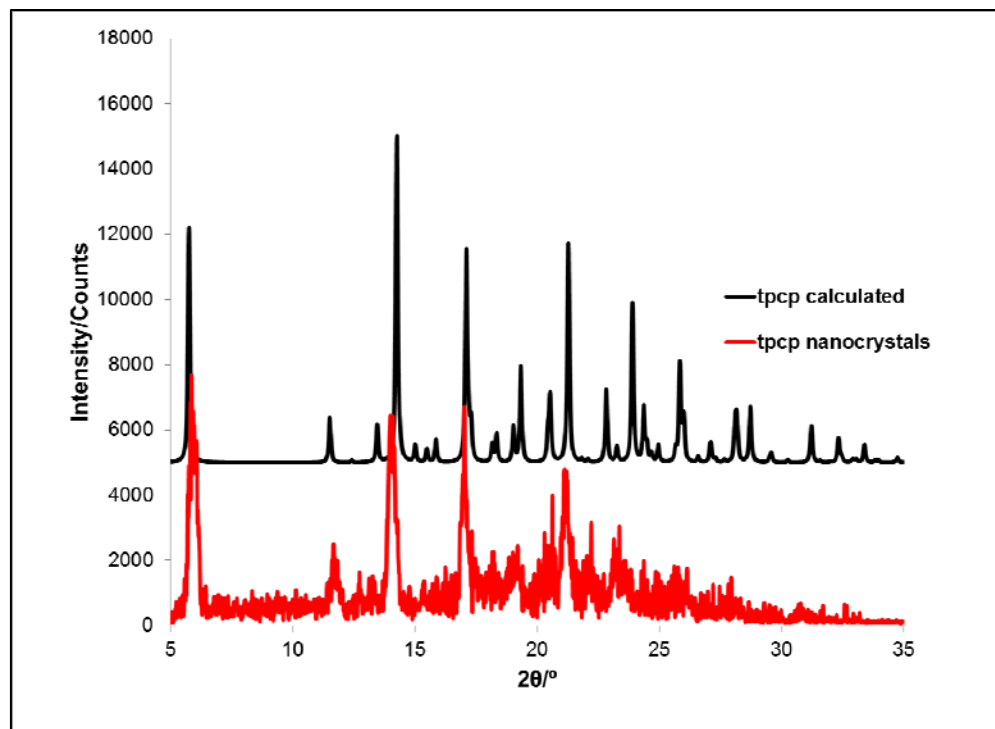

**Figure S-4:** PXRd diffractogram of tcp nanocrystals compared to the calculated pattern.

## Spectroscopic Data

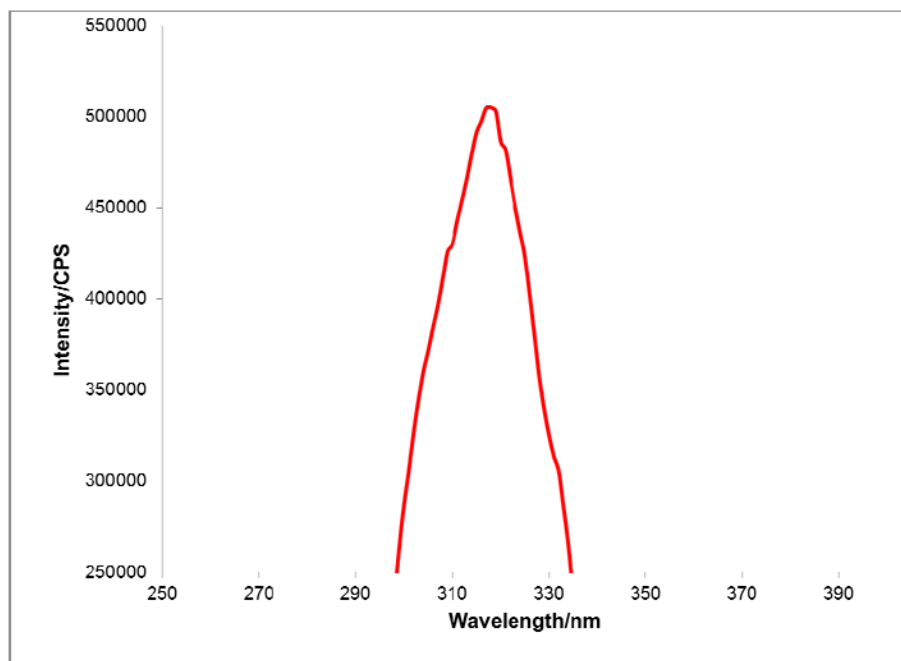

**Figure S-5:** Excitation spectrum of pCp in DMF.

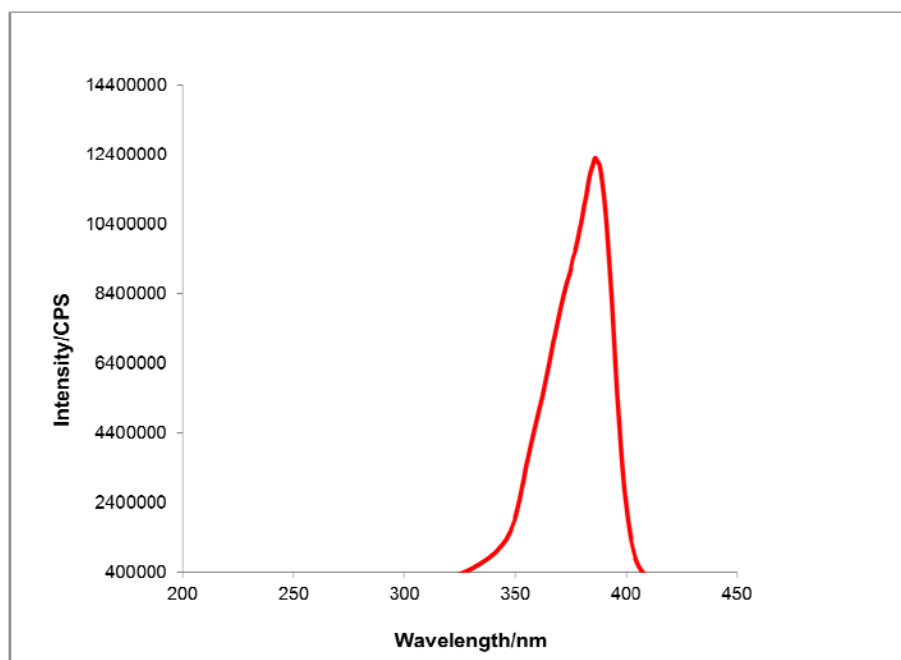

**Figure S-6:** Excitation spectrum of tpcp in DMF.

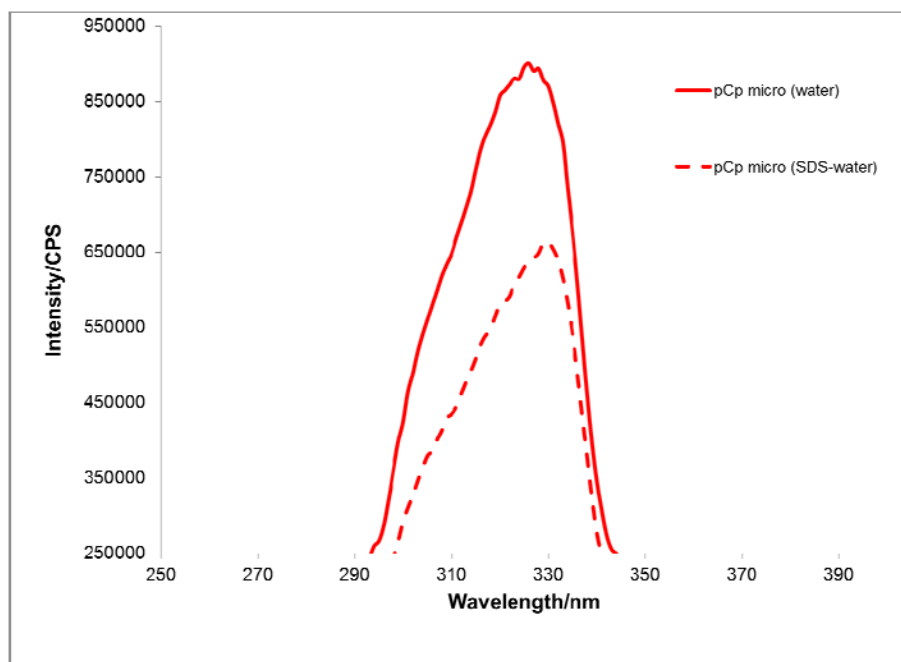

**Figure S-7:** Excitation spectra of pCp microcrystalline suspensions.

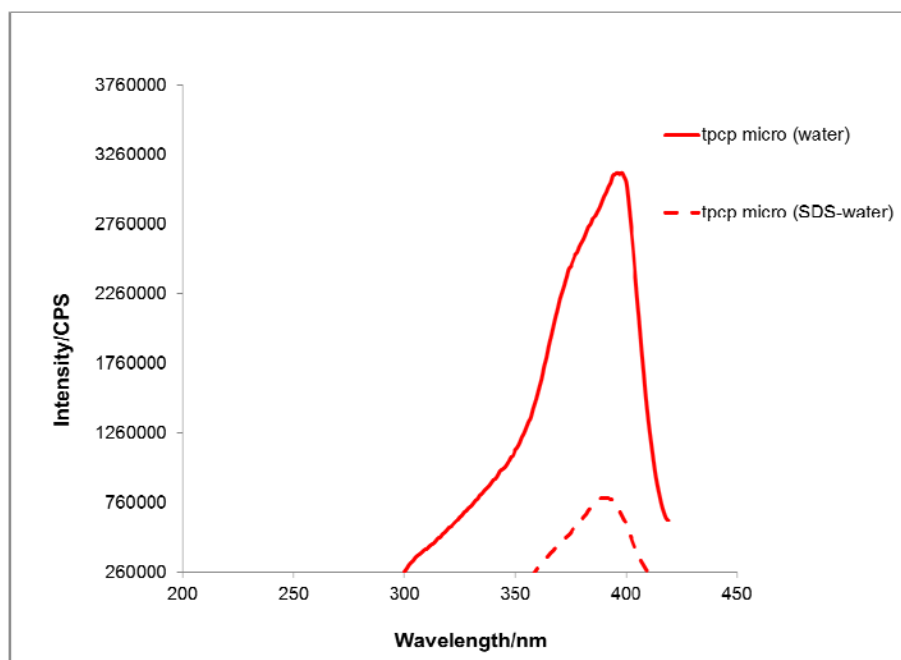

**Figure S-8:** Excitation spectra of tcp microcrystalline suspensions.

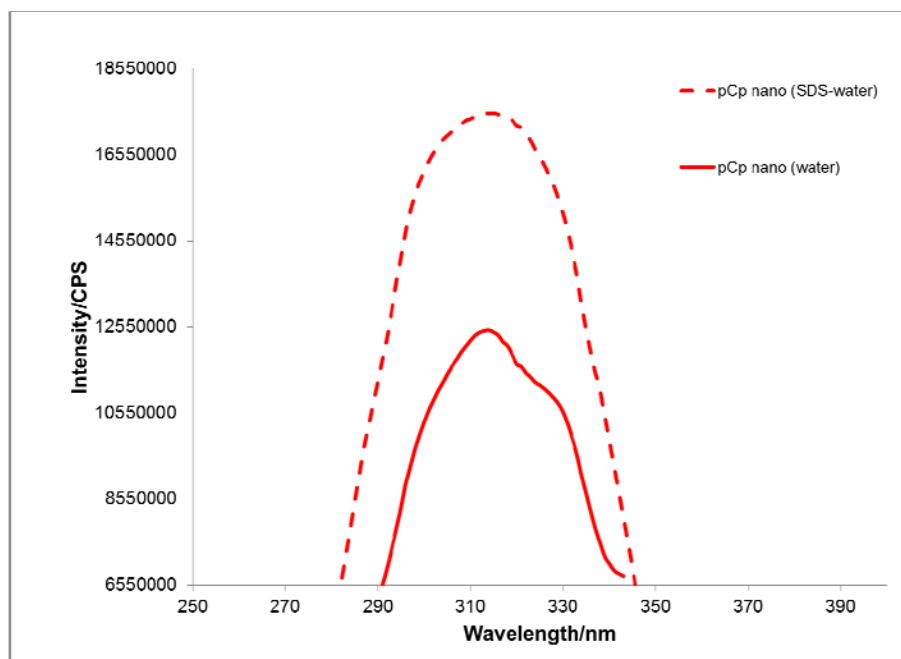

**Figure S-9:** Excitation spectra of pCp nanocrystalline suspensions.

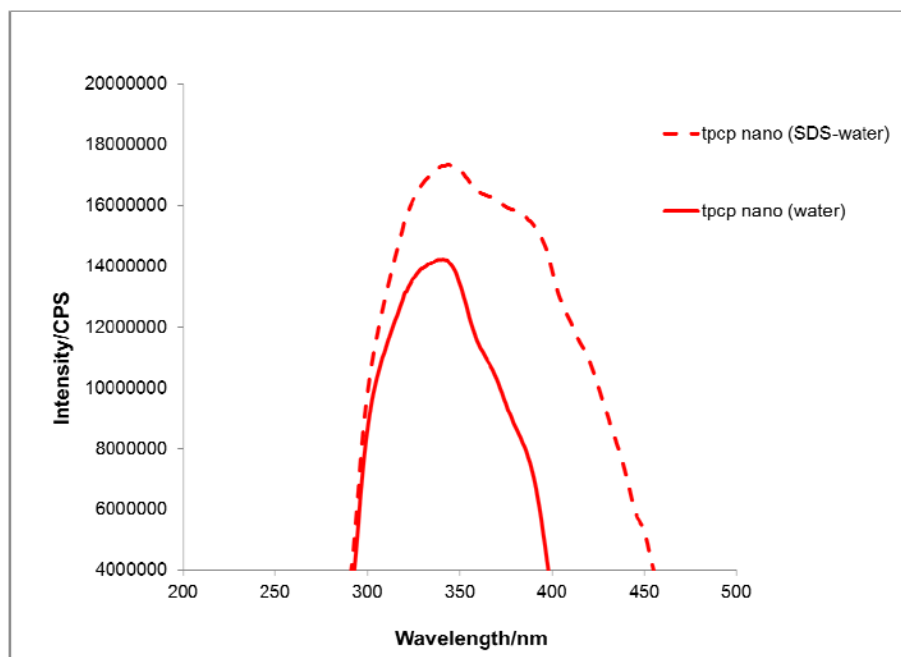

**Figure S-10:** Excitation spectra of tcp nanocrystalline suspensions.

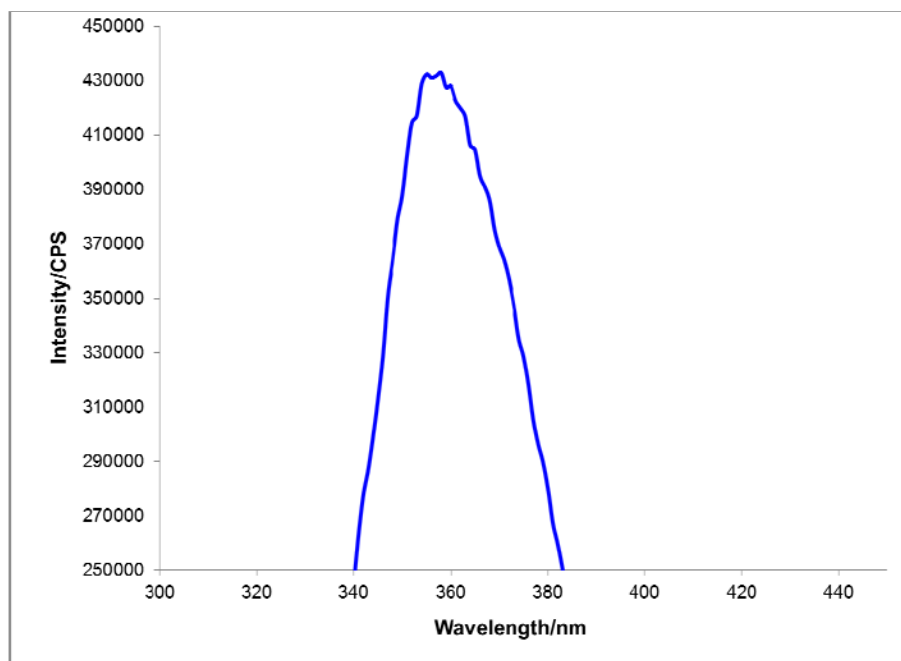

**Figure S-11:** Emission spectrum of pCp in solution.

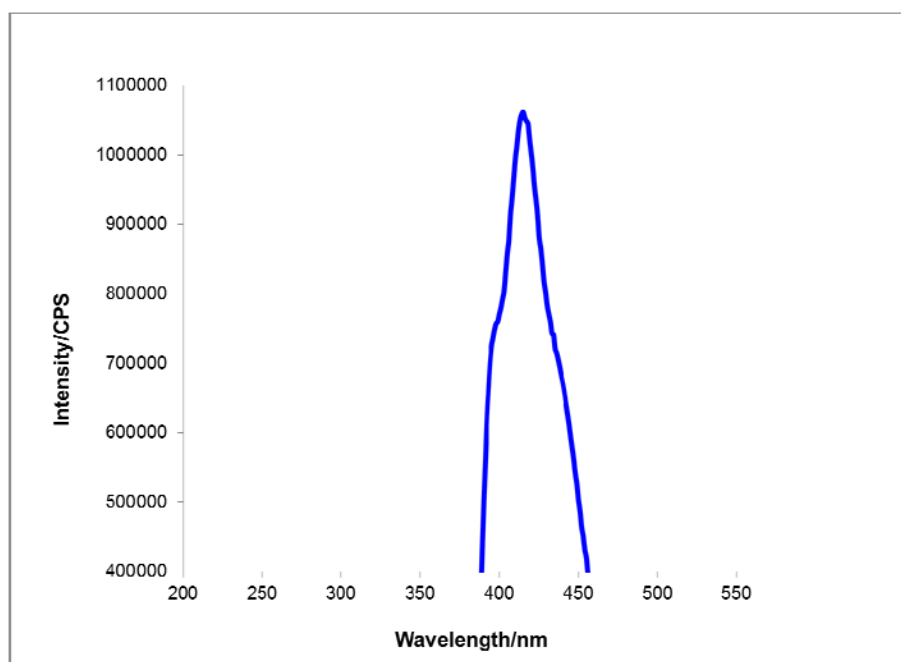

**Figure S-12:** Emission spectrum of tpcp in solution.

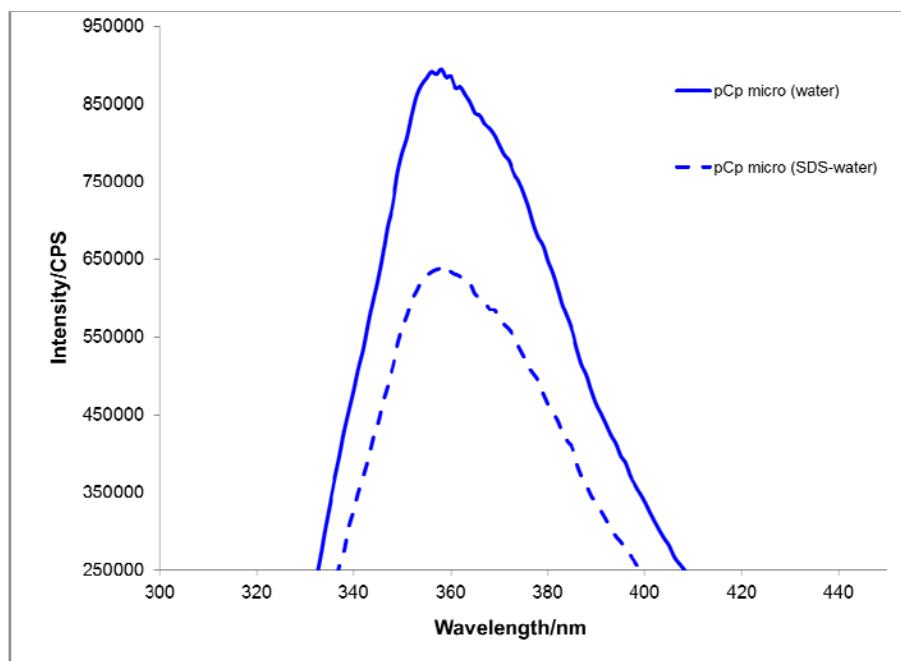

**Figure S-13:** Emission spectra of pCp microcrystalline suspensions.

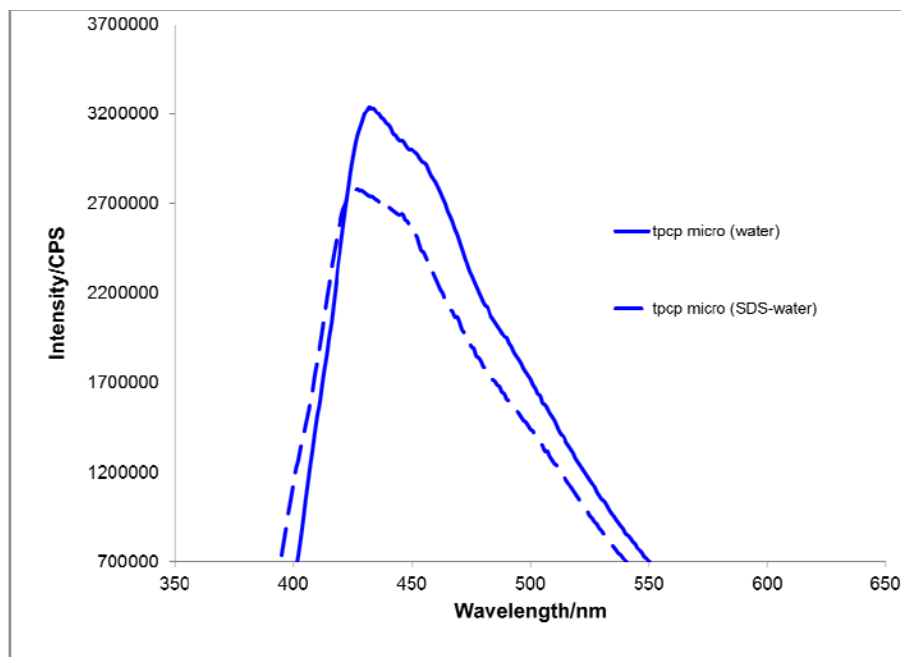

**Figure S-14:** Emission spectra of tcp microcrystalline suspensions.



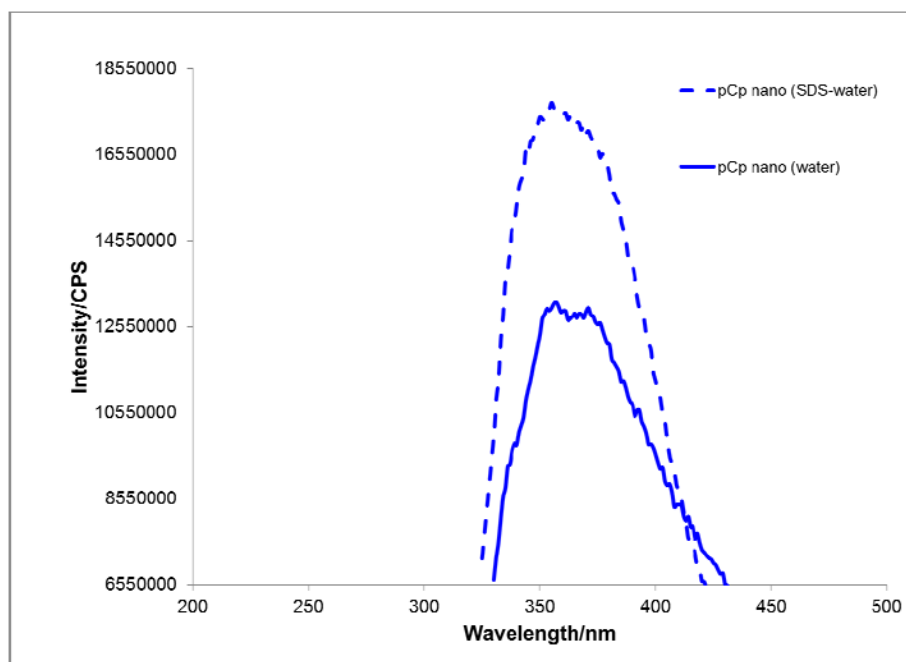

**Figure S-15:** Emission spectra of pCp nanocrystalline suspensions.

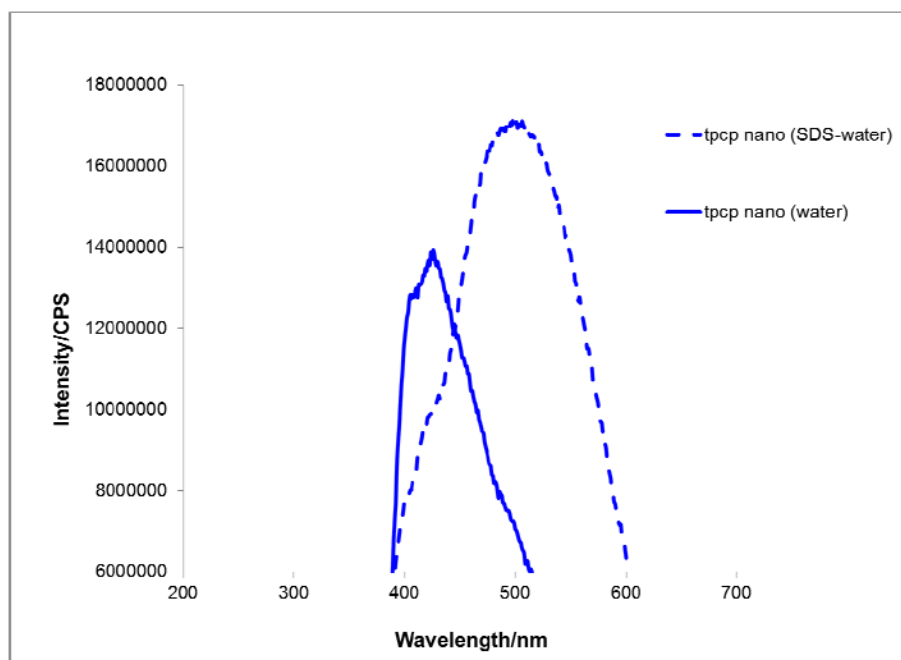

**Figure S-16:** Emission spectra of tcp nanocrystalline suspensions.

*Comparison of Emission Profiles*

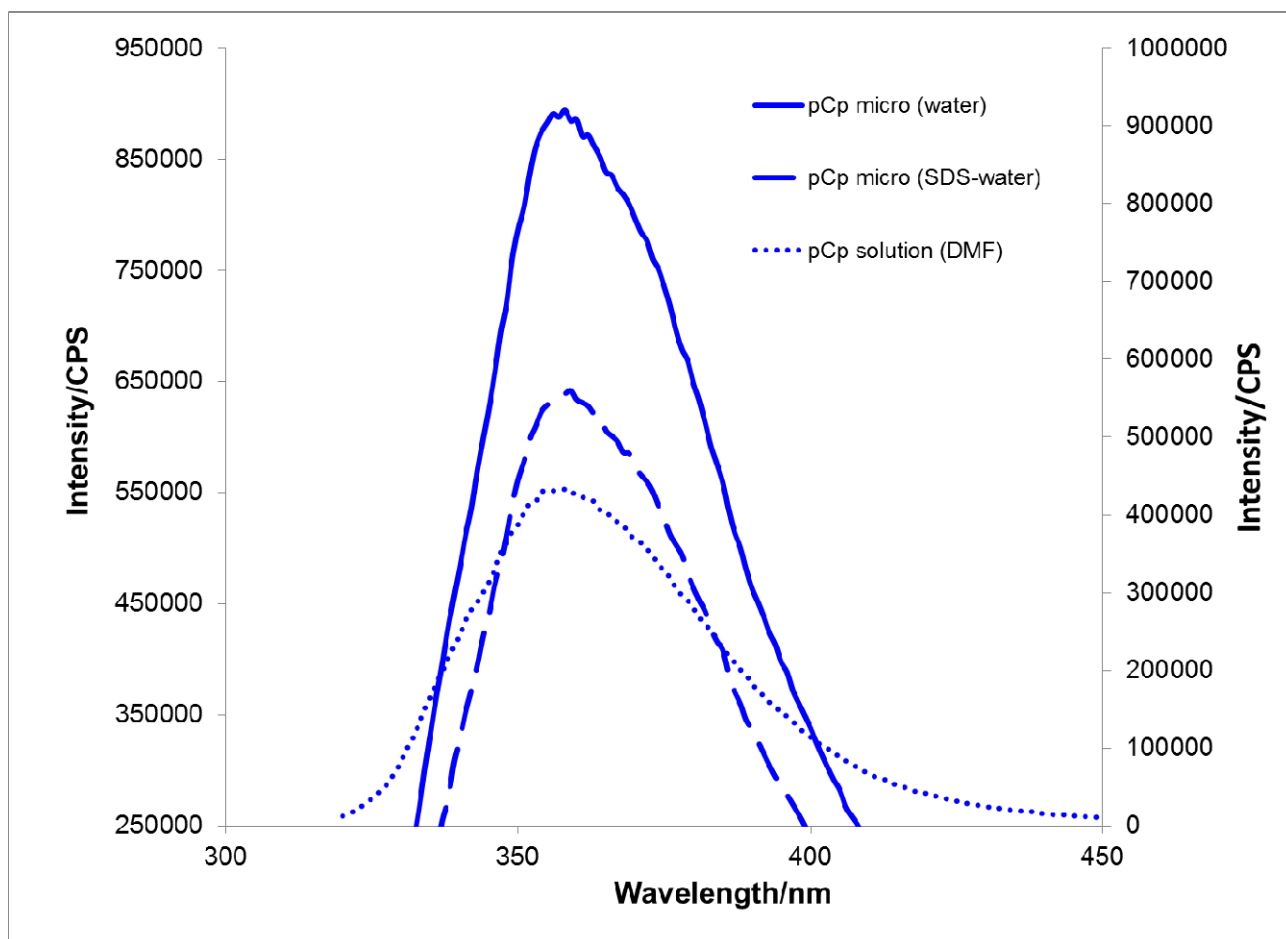

**Figure S-17:** Emission spectra of pCp microcrystalline suspensions compared to pCp in solution (solution result is plotted on the secondary axis).

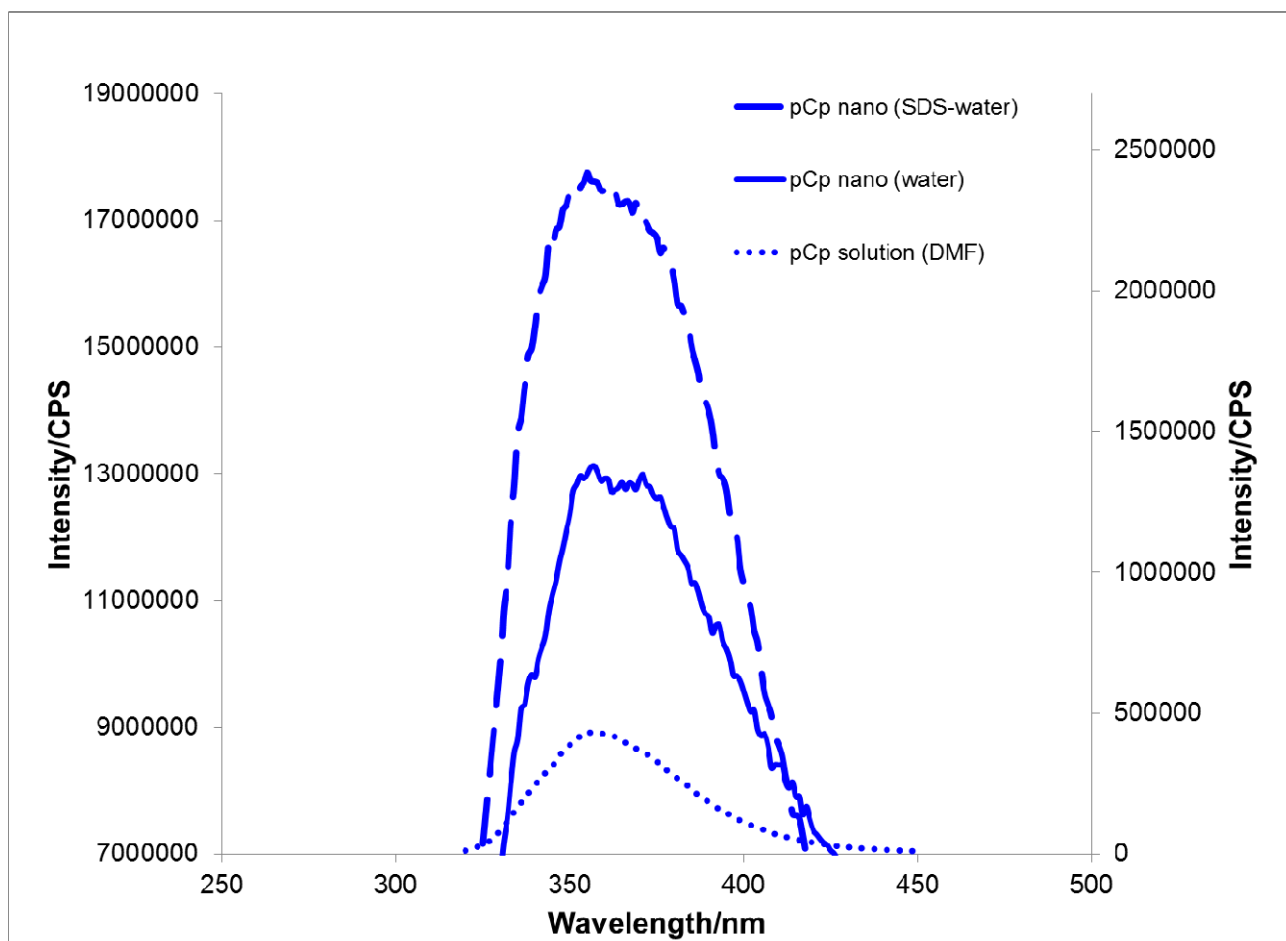

**Figure S-18:** Emission spectra of pCp nanocrystalline suspensions compared to pCp in solution (solution result is plotted on the secondary axis).

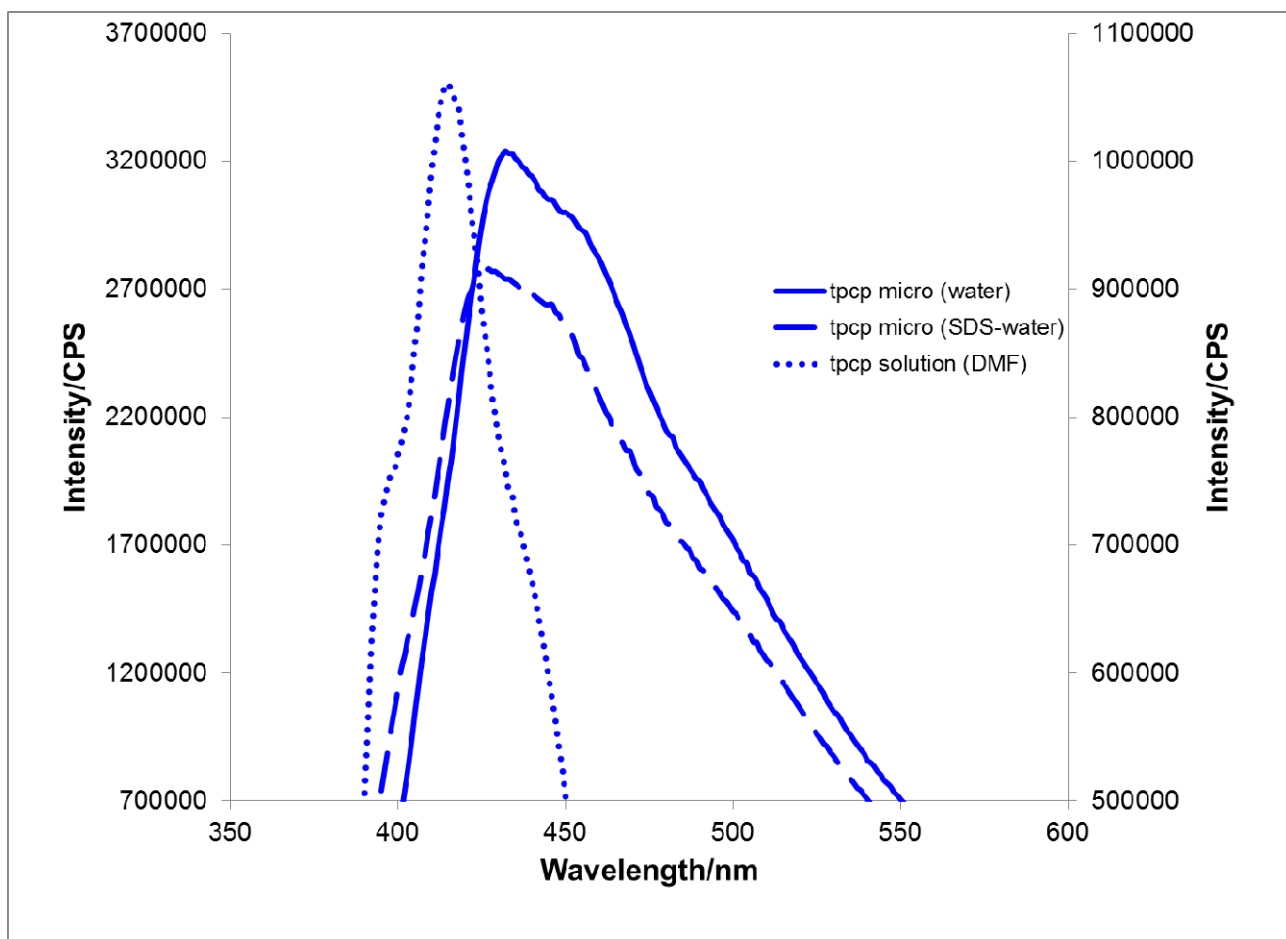

**Figure S-19:** Emission spectra of tcp microcrystalline suspensions compared to tcp in solution (solution result is plotted on the secondary axis).

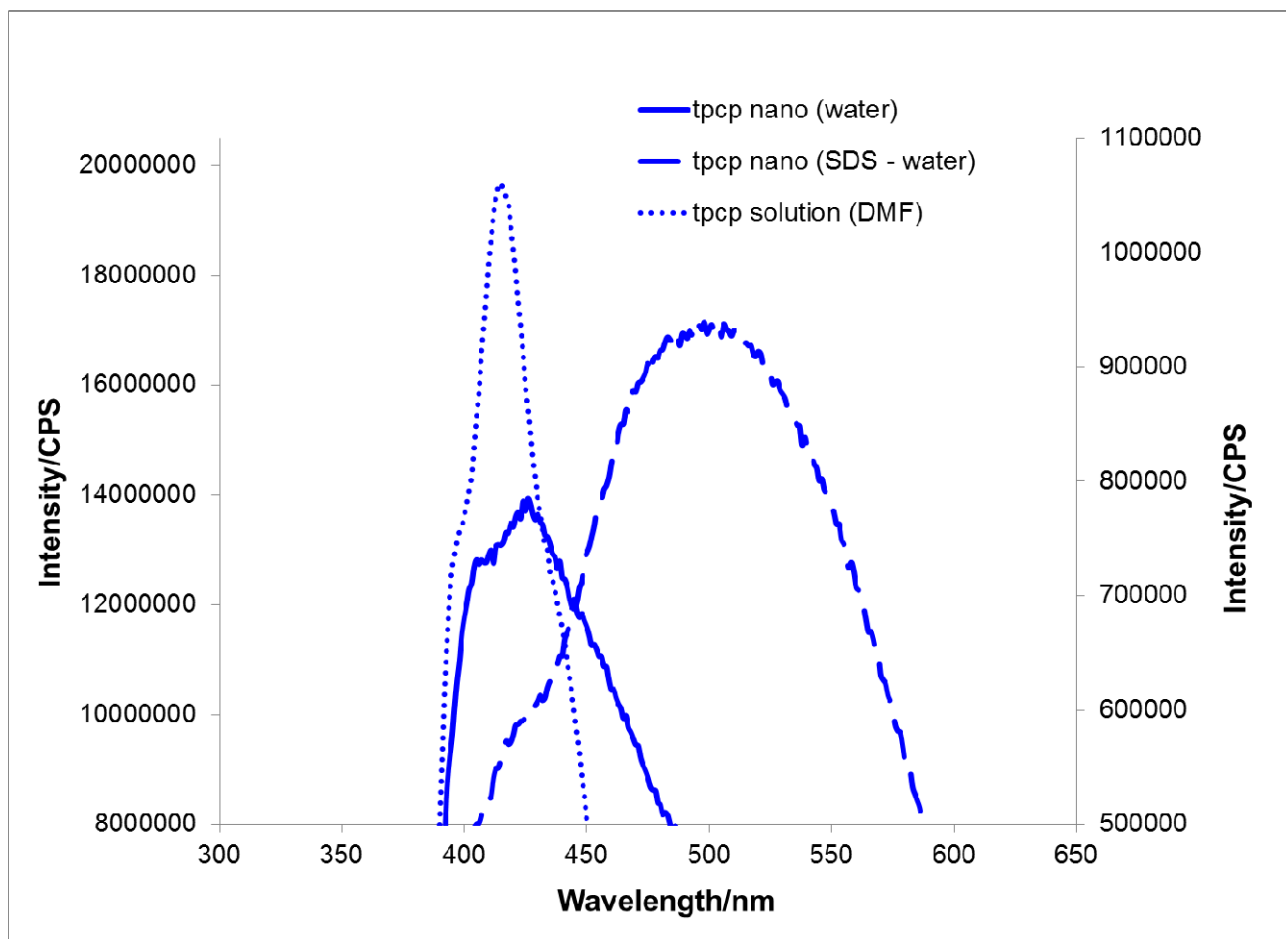

**Figure S-20:** Emission spectra of tcp nanocrystalline suspensions compared to tcp in solution (solution result is plotted on the secondary axis).

### SEM Micrographs:

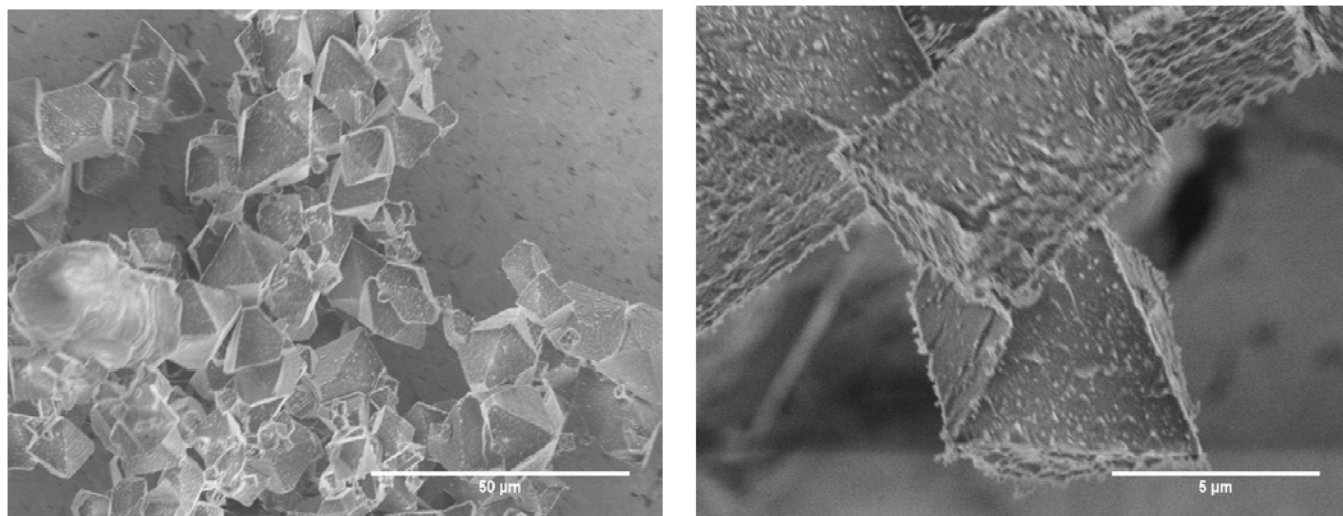

**Figure S-21:** SEM micrographs of pCp microcrystals from reprecipitation.

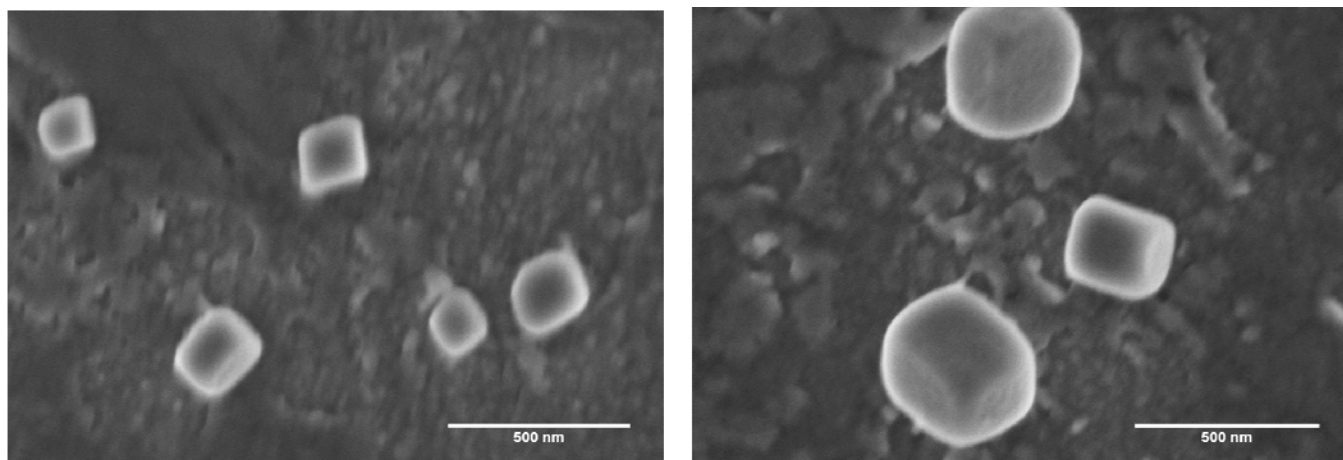

**Figure S-22:** SEM micrographs of pCp nanocrystals generated using sonochemistry.

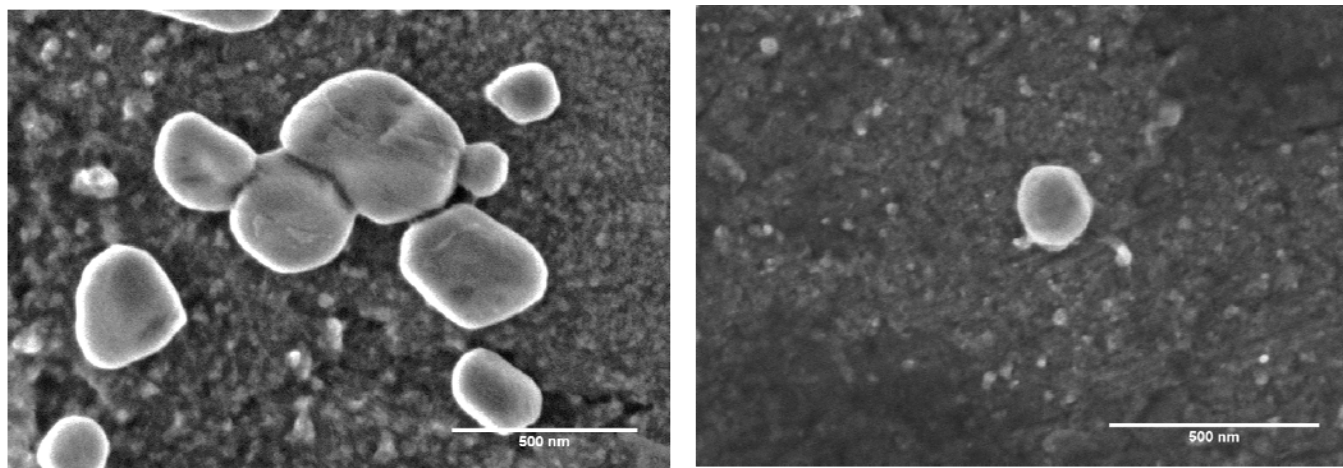

**Figure S-23:** SEM micrographs of pCp nanocrystals generated using sonochemistry with the addition of SDS.

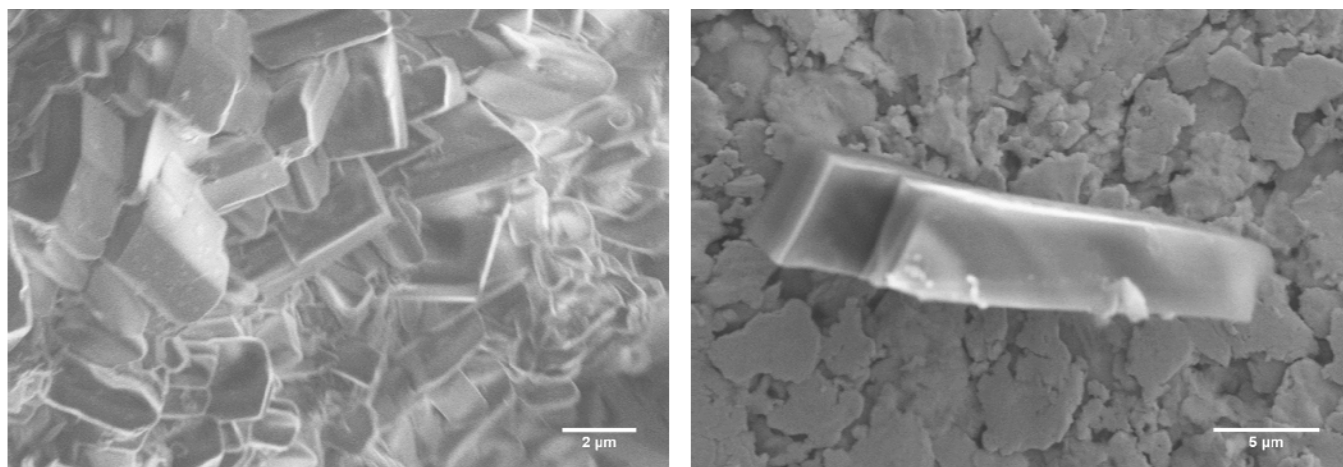

**Figure S-24:** SEM micrographs of tpcp microcrystals from reprecipitation.

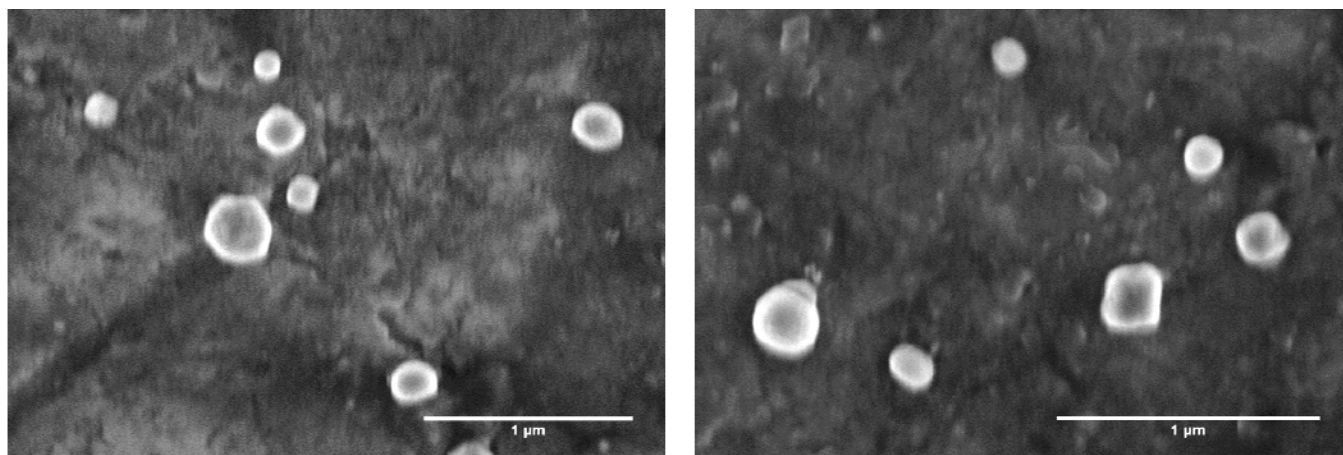

**Figure S-25:** SEM micrographs of tpcp nanocrystals generated using sonochemistry.

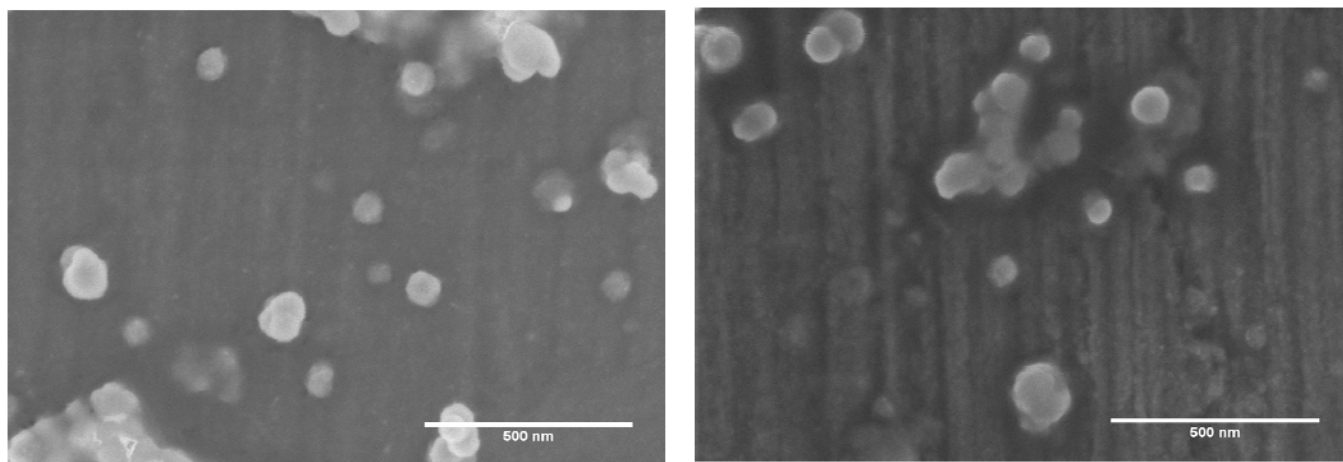

**Figure S-26:** SEM micrographs of tpcp nanocrystals generated using sonochemistry with the addition of SDS.
